# Supplementary material for: A novel mechanism of cone photoreceptor adaptation
Source: PubMed Central journal article supplement (PMC5389785; doi:10.1371/journal.pbio.2001210), 2017-04-12
Supplement: pbio.2001210.s005.pdf [file pbio.2001210.s005.pdf]

**S5 Figure: The normalized frequency response curves of the L-, M- and S- cone under voltage clamp conditions to high and low contrast stimuli using the SoS stimulus shown in Fig 3A.**

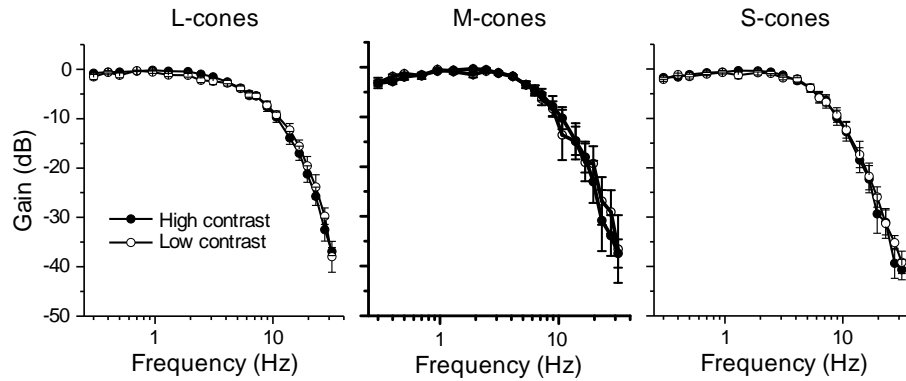

In this condition the frequency response was unaffected by stimulus contrast levels (also see S1 Table and S2 Table). Data shown as means  $\pm$  SEM. The data to generate this figure can be found in the S1 Data file.
