# Supplementary material for: A novel mechanism of cone photoreceptor adaptation
Source: PubMed Central journal article supplement (PMC5389785; doi:10.1371/journal.pbio.2001210), 2017-04-12
Supplement: pbio.2001210.s007.pdf [file pbio.2001210.s007.pdf]

**S1 Table: Light dependent structure predicted by the linear filter**

|               | High contrast |         |                    | Low contrast |         |                    |
|---------------|---------------|---------|--------------------|--------------|---------|--------------------|
|               | % predicted   | n cones | n stimulus repeats | % predicted  | n cones | n stimulus repeats |
| L-cones       |               |         |                    |              |         |                    |
| Current Clamp | 98.1 ± 0.56   | 6       | 7.3 ± 0.42         | 94.9 ± 1.92  | 6       | 7.0 ± 0.68         |
| Voltage Clamp | 97.0 ± 0.31   | 7       | 6.9 ± 0.40         | 90.8 ± 0.90  | 7       | 7.3 ± 0.71         |
| M-cones       |               |         |                    |              |         |                    |
| Current Clamp | 98.9 ± 0.21   | 6       | 6.3 ± 0.33         | 96.8 ± 1.07  | 6       | 5.7 ± 0.49         |
| Voltage Clamp | 95.9 ± 1.06   | 5       | 6.17 ± 0.65        | 89.5 ± 3.89  | 5       | 6.5 ± 0.99         |
| S-cones       |               |         |                    |              |         |                    |
| Current Clamp | 97.2 ± 0.36   | 6       | 6.2 ± 0.65         | 96.2 ± 0.85  | 6       | 6.8 ± 0.60         |
| Voltage Clamp | 97.1 ± 0.97   | 5       | 5.6 ± 0.81         | 92.0 ± 2.28  | 5       | 5.8 ± 0.58         |

Mean ± SEM percentage of the light dependent structure predicted by the linear filter [1]

when using the SoS stimulus containing 21 sinusoids shown in Fig 3A. The data to generate this table can be found in the S1 Data file.

1. Rieke F. Temporal contrast adaptation in salamander bipolar cells. *J Neurosci.* 2001;21(23):9445-54.
