# Supplementary material for: A novel mechanism of cone photoreceptor adaptation
Source: PubMed Central journal article supplement (PMC5389785; doi:10.1371/journal.pbio.2001210), 2017-04-12
Supplement: pbio.2001210.s008.pdf [file pbio.2001210.s008.pdf]

**S2 Table: -3dB cut-off frequencies and frequency response curves slopes**

|                               | $f_{3dB}$ (Hz) |              | n | p     | Slope (dB/Hz ) |              | n | p     |
|-------------------------------|----------------|--------------|---|-------|----------------|--------------|---|-------|
|                               | High contrast  | Low contrast |   |       | High contrast  | Low contrast |   |       |
| L-cone                        | 6.0 ± 0.28     | 5.0 ± 0.34   | 6 | 0.003 | -1.4 ± 0.05    | -1.6 ± 0.07  | 6 | 0.014 |
| M-cone                        | 5.9 ± 0.44     | 5.0 ± 0.41   | 6 | 0.002 | -1.4 ± 0.08    | -1.7 ± 0.05  | 6 | 0.012 |
| S-cone                        | 3.5 ± 0.5      | 3.4 ± 0.28   | 6 | 0.79  | -2.2 ± 0.12    | -2.0 ± 0.09  | 6 | 0.27  |
| L-and M-cones in 50 μM ZD7288 | 4.6 ± 0.75     | 4.6 ± 0.64   | 6 | 0.91  | -2.0 ± 0.11    | -2.1 ± 0.07  | 6 | 0.76  |

|        |    |        | $f_{3dB}$     |              | Slope         |              |
|--------|----|--------|---------------|--------------|---------------|--------------|
|        |    |        | High contrast | Low contrast | High contrast | Low contrast |
| L-cone | Vs | M-cone | p = 0.78      | p = 0.98     | p = 0.59      | p = 0.14     |
| S-cone | Vs | L-cone | p = 0.0015    | p = 0.0054   | p = 0.00018   | p = 0.0038   |
| S-cone | Vs | M-cone | p = 0.0059    | p = 0.011    | p = 0.00026   | p = 0.016    |

-3dB cut-off frequencies ( $f_{3dB}$ ) and frequency response curves slopes for all 3 cones types in high and low contrast conditions when recorded in current clamp (mean ± SEM) using the SoS stimulus shown in Fig 3A. Paired sample p values are given in the upper panel and independent sample p values given in the lower panel. The data to generate this table can be found in the S1 Data file.
