# Supplementary material for: A novel mechanism of cone photoreceptor adaptation
Source: PubMed Central journal article supplement (PMC5389785; doi:10.1371/journal.pbio.2001210), 2017-04-12
Supplement: pbio.2001210.s009.pdf [file pbio.2001210.s009.pdf]

**S3 Table: Properties of the impulse response functions**

|                   | Current Impulse Response |              |      | Voltage Impulse Response |              |       |
|-------------------|--------------------------|--------------|------|--------------------------|--------------|-------|
|                   | High Contrast            | Low contrast | p    | High Contrast            | Low contrast | p     |
| L-cones           | n = 7                    |              |      | n = 6                    |              |       |
| Time to peak (ms) | 48.4 ± 2.68              | 46.4 ± 2.30  | 0.43 | 54.0 ± 1.57              | 60.3 ± 2.04  | 0.009 |
| FWHM (ms)         | 48.0 ± 4.07              | 43.8 ± 4.30  | 0.11 | 48.0 ± 1.19              | 54.8 ± 2.06  | 0.003 |
| M-cones           | n = 5                    |              |      | n = 6                    |              |       |
| Time to peak (ms) | 50.0 ± 5.89              | 49.8 ± 6.34  | 0.75 | 52.3 ± 2.30              | 62.2 ± 2.20  | 0.008 |
| FWHM (ms)         | 51.2 ± 8.43              | 52.0 ± 8.82  | 0.78 | 51.9 ± 3.95              | 61.5 ± 2.79  | 0.012 |
| S-cones           | n = 5                    |              |      | n = 6                    |              |       |
| Time to peak (ms) | 54.6 ± 4.55              | 54.4 ± 4.03  | 0.86 | 76.2 ± 5.15              | 73.5 ± 4.84  | 0.66  |
| FWHM (ms)         | 61 ± 6.95                | 60.4 ± 6.45  | 0.78 | 90.1 ± 10.05             | 83.9 ± 6.98  | 0.53  |

|                          |    |        | Time to peak  |              | FWHM          |              |
|--------------------------|----|--------|---------------|--------------|---------------|--------------|
| Current Impulse Response |    |        | High contrast | Low contrast | High contrast | Low contrast |
| L-cone                   | Vs | M-cone | p = 0.82      | p = 0.64     | p = 0.74      | p = 0.43     |
| S-cone                   | Vs | L-cone | p = 0.28      | p = 0.13     | p = 0.15      | p = 0.067    |
| S-cone                   | Vs | M-cone | p = 0.55      | p = 0.56     | p = 0.40      | p = 0.47     |
| Voltage Impulse Response |    |        |               |              |               |              |
| L-cone                   | Vs | M-cone | p = 0.57      | p = 0.55     | p = 0.37      | p = 0.085    |
| S-cone                   | Vs | L-cone | p = 0.0064    | p = 0.042    | p = 0.0083    | p = 0.0075   |
| S-cone                   | Vs | M-cone | p = 0.0040    | p = 0.071    | p = 0.011     | p = 0.022    |

| Voltage Impulse Responses under high contrast |    |                   |             |              |             |
|-----------------------------------------------|----|-------------------|-------------|--------------|-------------|
|                                               | n  | Time to peak (ms) | p Vs ZD7288 | FWHM (ms)    | p Vs ZD7288 |
| L-and M-cones in ZD7288                       | 10 | 75.5 ± 4.50       |             | 75.6 ± 7.06  |             |
| Pooled L-and M-cones                          | 12 | 53.2 ± 1.35       | 0.000051    | 49.9 ± 2.05  | 0.0012      |
| S-cones                                       | 6  | 76.2 ± 5.15       | 0.93        | 90.1 ± 10.05 | 0.25        |

The impulse response functions time to peak and full width at half maximum (FWHM) for all three cone-types using the SoS stimulus shown in Fig 3A. The upper panel shows data for the current and voltage impulse responses for high and low contrast conditions. Corresponding paired sample p values are also shown. Independent sample p values comparing across these groups are given in the middle panel. The lower panel only gives data for voltage impulse response functions in the high contrast condition and corresponding independent sample p values. Data is shown for L-and M-cone in the presence of 50 μM ZD7288, and from the upper

panel the pooled result for L and M-cones and the data for S-cone. Data shown as mean  $\pm$  SEM.

The data to generate this table can be found in the S1 Data file.
